# Supplementary material for: Urban Farming Visitor Center
Source: publisher site journal article supplement (doi:10.18632/aging.101769), 2014-06-24
Supplement: Supplementary file [file aging-v11i2-101769-supplementary-material-SD5.pdf]

### Short Run Emphasis Associated Biological Processes

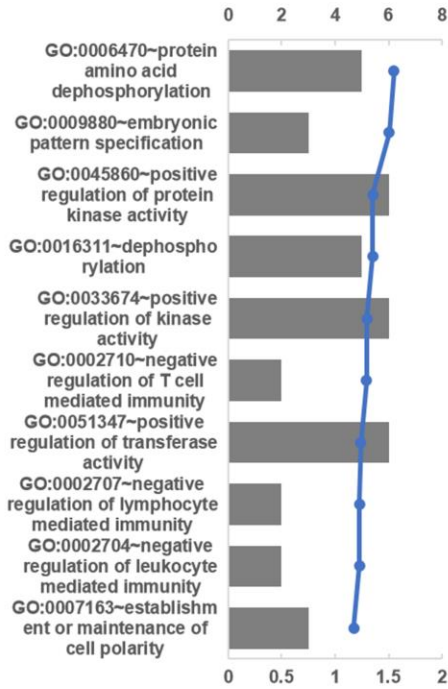

### Run Percentage Associated Biological Processes

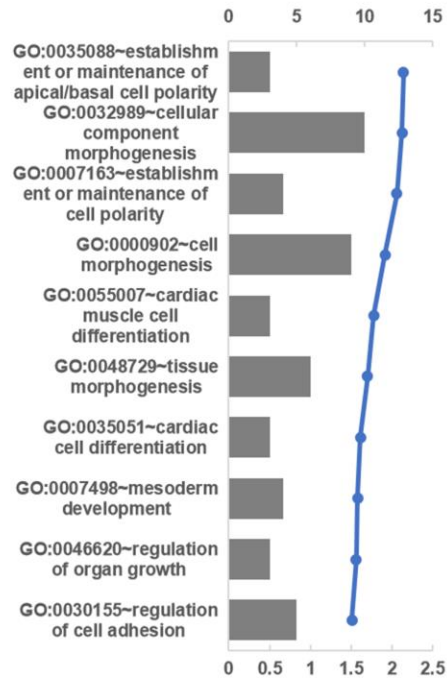

### Entropy(Group3) Associated Biological Processes

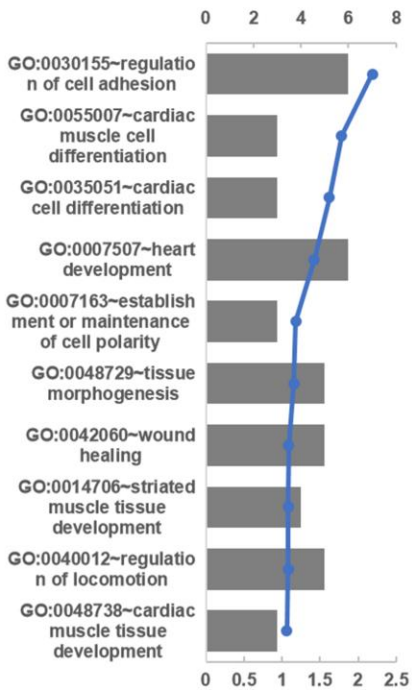

### Contrast Associated Biological Processes

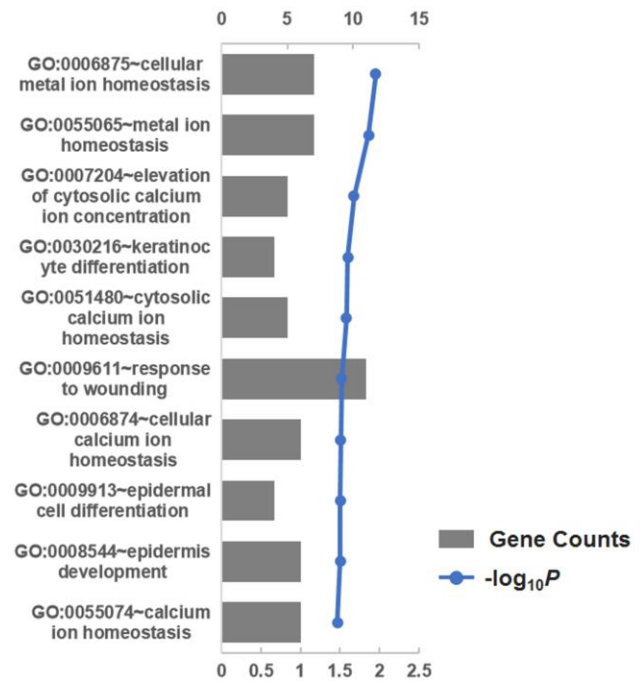

Supplementary Figure 5. The associated genes and relevant GO result of Group3 descriptors: Short Run Emphasis, Run percentage, Entropy (Group3), and Contrast.
