# Supplementary material for: Urban Farming Visitor Center
Source: publisher site journal article supplement (doi:10.18632/aging.101769), 2014-06-24
Supplement: Supplementary file [file aging-v11i2-101769-supplementary-material-SD6.pdf]

**A**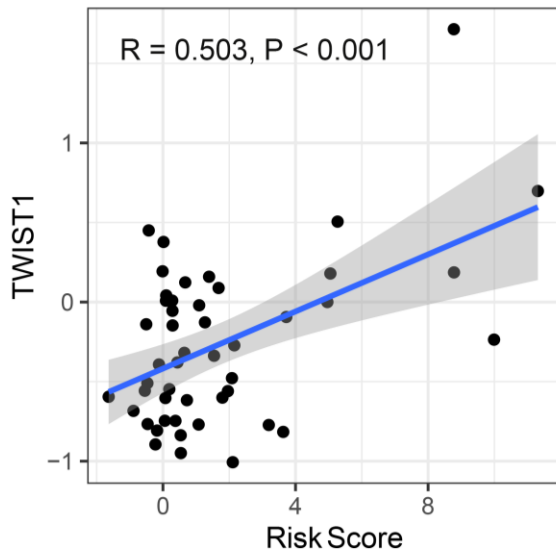**B**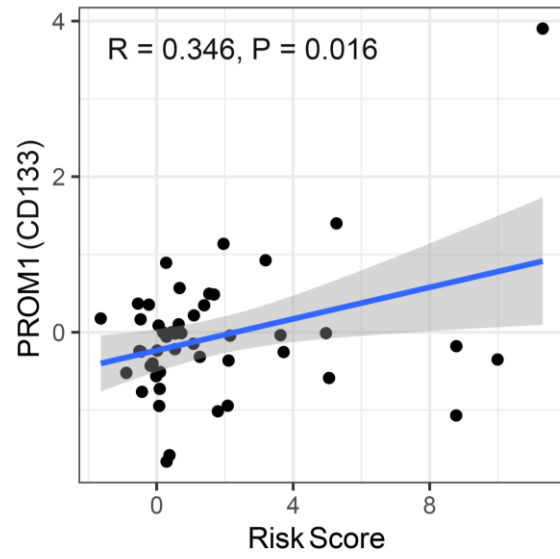

Supplementary Figure 6. Pearson correlation analysis was performed between the radiomics risk score and the glioma stem cell markers TWIST1 and CD133.
