# Supplementary material for: Urban Farming Visitor Center
Source: publisher site journal article supplement (doi:10.18632/aging.101769), 2014-06-24
Supplement: Supplementary file [file aging-v11i2-101769-supplementary-material-SD8.pdf]

**Supplementary Table 2. Forty differentially expressed radiomic features between IDH mutant and IDH wildtype groups in the xenograft model.**

| <b>Number</b> | <b>Features</b>                |
|---------------|--------------------------------|
| 1             | Energy (Group 1)               |
| 2             | Energy_LLL (Group 1 derived)   |
| 3             | Energy_LHL (Group 1 derived)   |
| 4             | Energy_HLH (Group 1 derived)   |
| 5             | Energy_HHL (Group 1 derived)   |
| 6             | Energy_HHH (Group 1 derived)   |
| 7             | Mean absolute deviation_HHL    |
| 8             | Mean absolute deviation_HHH    |
| 9             | Maximum_LLL                    |
| 10            | Maximum_LHL                    |
| 11            | Maximum_LHH                    |
| 12            | Maximum_HLL                    |
| 13            | Maximum_HLH                    |
| 14            | Maximum_HHL                    |
| 15            | Maximum_HHH                    |
| 16            | Mean                           |
| 17            | Mean_LLL                       |
| 18            | Mean_HHL                       |
| 19            | Median                         |
| 20            | Median_LLL                     |
| 21            | Range_LLH                      |
| 22            | Range_LHL                      |
| 23            | Range_HLL                      |
| 24            | Range_HLH                      |
| 25            | Range_HHL                      |
| 26            | Range_HHH                      |
| 27            | Root mean square               |
| 28            | Root mean square_LLL           |
| 29            | Root mean square_LHL           |
| 30            | Root mean square_HLH           |
| 31            | Root mean square_HHL           |
| 32            | Root mean square_HHH           |
| 33            | Standard deviation_LHL         |
| 34            | Standard deviation_HLH         |
| 35            | Standard deviation_HHL         |
| 36            | Standard deviation_HHH         |
| 37            | Variance_LHL (Group 1 derived) |
| 38            | Variance_HLH (Group 1 derived) |
| 39            | Variance_HHL (Group 1 derived) |
| 40            | Variance_HHH (Group 1 derived) |
