# Supplementary material for: Urban Farming Visitor Center
Source: publisher site journal article supplement (doi:10.18632/aging.101769), 2014-06-24
Supplement: Supplementary file [file aging-v11i2-101769-supplementary-material-SD9.pdf]

**Supplementary Table 3. Top 10 genes that were positively associated with surface to volume ratio.**

| <b>Genes</b> | <b>Pearson correlation coefficients</b> | <b><i>P</i></b> |
|--------------|-----------------------------------------|-----------------|
| OTX1         | 0.548373009                             | 5.46E-05        |
| SP8          | 0.535831595                             | 8.68E-05        |
| BAG5         | 0.528369318                             | 0.000113355     |
| C9orf144B    | 0.507442171                             | 0.000232145     |
| GPR37L1      | 0.501972823                             | 0.000277878     |
| RAB4B        | 0.489037137                             | 0.000420165     |
| AHCYL2       | 0.48877379                              | 0.000423645     |
| KIAA0090     | 0.483516067                             | 0.000498797     |
| ATP1A4       | 0.475963747                             | 0.000627815     |
