# Supplementary material for: IDH mutation-specific radiomic signature in lower-grade gliomas
Source: Aging (Albany NY). 2019 Jan 29;11(2):673–96. doi: 10.18632/aging.101769 (PMC6366985; doi:10.18632/aging.101769)
Supplement: Supplementary Table 1 [file aging-11-101769-s007.pdf]

**Supplementary Table 1. Differential Radiomics features (n=146) between IDH mutant and IDH wildtype groups in the training set.**

| Features Type                   |                               |             |                        |
|---------------------------------|-------------------------------|-------------|------------------------|
| Shape and size based features   |                               |             |                        |
| Surface to Volume Ratio         |                               |             |                        |
| First order statistics          |                               |             |                        |
| Energy                          | Entropy                       |             | Median                 |
| Mean                            | Root mean square              |             |                        |
| Gray Level Co-occurrence Matrix |                               |             |                        |
| Contrast                        | Dissimilarity                 |             |                        |
| Energy                          | Entropy                       |             |                        |
| Difference entropy              | IMC1                          |             |                        |
| Gray Level Run-Length Matrix    |                               |             |                        |
| Short run emphasis              | Run Percentage                |             |                        |
| Wavelet features                |                               |             |                        |
| Cluster shade_HLL               | Energy_HHL (group 1 derived)  | Maximum_LLH | Root mean square_HLL   |
| Contrast_LLL                    | Energy_HHL (group 3 derived)  | Maximum_LHL | Root mean square_HLH   |
| Contrast_LLH                    | Energy_HHH (group 1 derived)  | Maximum_LHH | Root mean square_HHL   |
| Contrast_LHL                    | Energy_HHH (group 3 derived)  | Maximum_HLL | Root mean square_HHH   |
| Contrast_HLH                    | Entropy_LLL (group 1 derived) | Maximum_HLH | Run percentage_LLL     |
| Contrast_HHL                    | Entropy_LLL (group 3 derived) | Maximum_HHL | Run percentage_LHL     |
| Contrast_HHH                    | Entropy_LLH (group 1 derived) | Maximum_HHH | Run percentage_LHH     |
| Difference entropy_LLL          | Entropy_LLH (group 3 derived) | Mean_LLL    | Run percentage_HLL     |
| Difference entropy_LLH          | Entropy_LHL (group 1 derived) | Mean_LLH    | Run percentage_HLH     |
| Difference entropy_LHL          | Entropy_LHL (group 3 derived) | Mean_LHL    | Run percentage_HHH     |
| Difference entropy_HLL          | Entropy_LHH (group 1 derived) | Mean_LHH    | Short run emphasis_LLL |
| Difference entropy_HLH          | Entropy_LHH (group 3 derived) | Mean_HLL    | Short run emphasis_LLH |
| Difference entropy_HHL          | Entropy_HLL (group 1 derived) | Mean_HLH    | Short run emphasis_LHL |
| Difference entropy_HHH          | Entropy_HLL (group 3 derived) | Mean_HHL    | Short run emphasis_LHH |
| Dissimilarity_LLL               | Entropy_HLH (group 1 derived) | Mean_HHH    | Short run emphasis_HLL |
| Dissimilarity_LLH               | Entropy_HLH (group 3 derived) | Median_LLL  | Short run emphasis_HLH |
| Dissimilarity_LHL               | Entropy_HHL (group 1 derived) | Median_LLH  | Short run emphasis_HHL |
| Dissimilarity_HLL               | Entropy_HHL (group 3 derived) | Median_LHL  | Short run emphasis_HHH |
| Dissimilarity_HLH               | Entropy_HHH (group 1 derived) | Median_LHH  | Standard deviation_LLH |

| Features Type                |                               |                      |                                |
|------------------------------|-------------------------------|----------------------|--------------------------------|
|                              | derived)                      |                      |                                |
| Dissimilarity_HHL            | Entropy_HHH (group 3 derived) | Median_HLH           | Standard deviation_LHL         |
| Dissimilarity_HHH            | IMC1_LLL                      | Median_HHL           | Standard deviation_LHH         |
| Energy_LLL (group 1 derived) | IMC1_HLL                      | Median_HHH           | Standard deviation_HLL         |
| Energy_LLL (group 3 derived) | IMC1_HLH                      | Minimum_LLL          | Standard deviation_HLH         |
| Energy_LLH (group 1 derived) | IMC1_HHL                      | Range_LLH            | Standard deviation_HHL         |
| Energy_LLH (group 3 derived) | IMC1_HHH                      | Range_LHL            | Standard deviation_HHH         |
| Energy_LHL (group 1 derived) | Mean absolute deviation_LLH   | Range_HLL            | Sum entropy_HHL                |
| Energy_LHL (group 3 derived) | Mean absolute deviation_LHL   | Range_HLH            | Variance_LLH (group 1 derived) |
| Energy_LHH (group 1 derived) | Mean absolute deviation_LHH   | Range_HHL            | Variance_LHL (group 1 derived) |
| Energy_LHH (group 3 derived) | Mean absolute deviation_HLL   | Range_HHH            | Variance_LHH (group 1 derived) |
| Energy_HLL (group 1 derived) | Mean absolute deviation_HLH   | Root mean square_LLL | Variance_HLL (group 1 derived) |
| Energy_HLL (group 3 derived) | Mean absolute deviation_HHL   | Root mean square_LLH | Variance_HLH (group 1 derived) |
| Energy_HLH (group 1 derived) | Mean absolute deviation_HHH   | Root mean square_LHL | Variance_HHL (group 1 derived) |
| Energy_HLH (group 3 derived) | Maximum_LLL                   | Root mean square_LHH | Variance_HHH (group 1 derived) |

IMC1 = Informational measure of correlation 1.
